# Supplementary material for: Chemico-pharmaceutical investigations of an inclusion complex formed with valacyclovir and γ-cyclodextrin optimized by molecular docking for innovative applications as topical gel
Source: Royal Society of Chemistry journal article supplement (doi:10.1039/d4nj02453b), 2024-01-01
Supplement: d4nj02453b1.pdf [file d4nj02453b1.pdf]

# **Supporting Information**

## **Chemico-Pharmaceutical Investigations of an Inclusion Complex formed with Valacyclovir and $\gamma$ -Cyclodextrin Optimized by Molecular Docking for Innovative Applications as Topical Gel**

Baishali Saha<sup>a</sup>, Nibir Das<sup>b</sup>, Paramita Paul<sup>b</sup>, Sanjoy Barman<sup>a</sup>, Modhusudan Mondal<sup>a</sup>,  
Subhadeep Saha<sup>c</sup>, Subhankar Choudhury<sup>d</sup>, Niloy Roy<sup>a</sup>, Salim Ali<sup>a</sup> and Mahendra Nath  
Roy<sup>\*a</sup>

<sup>a</sup>*Department of Chemistry, University of North Bengal, Darjeeling – 734013, India*

<sup>b</sup>*Department of Pharmaceutical Technology, University of North Bengal, Darjeeling, India*

<sup>c</sup>*Department of Chemistry, Government General Degree College at Pedong, Kalimpong-734311,  
India*

<sup>d</sup>*Department of Chemistry, Malda College, Malda, 732101, India*

*Corresponding Author's E-mail: [mahendraroy2002@yahoo.co.in](mailto:mahendraroy2002@yahoo.co.in)*

| <b><u>Table No.</u></b> | <b><u>Page No.</u></b> |
|-------------------------|------------------------|
| Table S1                | Page 2                 |
| Table S2                | Page 2                 |
| Table S3                | Page 3                 |
| Table S4                | Page 3, 4              |
| Table S5                | Page 4, 5              |
| Table S6                | Page 5, 6              |
| Table S7                | Page 6                 |
| Figure S1               | Page 7                 |
| Figure S2               | Page 8                 |
| Figure S3               | Page 8                 |
| Figure S4               | Page 9                 |

**Table S1: Composition of gel:**

| Composition                 | VC loaded gel       | ICVC loaded gel                  |
|-----------------------------|---------------------|----------------------------------|
| Carbopol 940 (g)            | 1                   | 1                                |
| Propylene glycol (g)        | 10                  | 10                               |
| Triethanolamine (g)         | 0.5                 | 0.5                              |
| Isopropyl alcohol (g)       | 10                  | 10                               |
| Double distilled water (mL) | 100                 | 100                              |
| Drug (mg)                   | VC (10 mg/g of gel) | ICVC (10 mg equivalent/g of gel) |

**Table S2. Data for the Job's plot performed by UV-Vis spectroscopy for VC+ $\gamma$ -CD system at 298.15 K<sup>a</sup>.**

| VC + GAMMA - CYCLODEXTRIN |                   |               |                         |                             |                |            |                                                      |
|---------------------------|-------------------|---------------|-------------------------|-----------------------------|----------------|------------|------------------------------------------------------|
| VC(mL)                    | $\gamma$ -CD (mL) | VC ( $\mu$ M) | $\gamma$ -CD ( $\mu$ M) | [VC]/([VC]+[ $\gamma$ -CD]) | Absorbance (A) | $\Delta A$ | $\Delta A \times [VC] / ([VC] + [\gamma\text{-CD}])$ |
| 0                         | 3                 | 0             | 10                      | 0                           | 0.0000         | 1.3255     | 0.0000                                               |
| 0.3                       | 2.7               | 1             | 9                       | 0.1                         | 0.16889238     | 1.1566     | 0.1157                                               |
| 0.6                       | 2.4               | 2             | 8                       | 0.2                         | 0.36161852     | 0.9639     | 0.1928                                               |
| 0.9                       | 2.1               | 3             | 7                       | 0.3                         | 0.45758152     | 0.8679     | 0.2604                                               |
| 1.2                       | 1.8               | 4             | 6                       | 0.4                         | 0.59646225     | 0.7290     | 0.2916                                               |
| 1.5                       | 1.5               | 5             | 5                       | 0.5                         | 0.70556307     | 0.6199     | 0.3100                                               |
| 1.8                       | 1.2               | 6             | 4                       | 0.6                         | 0.83200979     | 0.4935     | 0.2961                                               |
| 2.1                       | 0.9               | 70            | 30                      | 0.7                         | 0.96572685     | 0.3598     | 0.2518                                               |
| 2.4                       | 0.6               | 80            | 20                      | 0.8                         | 1.11982346     | 0.2057     | 0.1645                                               |
| 2.7                       | 0.3               | 90            | 10                      | 0.9                         | 1.16047287     | 0.1650     | 0.1485                                               |
| 3                         | 0                 | 100           | 0                       | 1                           | 1.32548428     | 0.0000     | 0.0000                                               |

<sup>a</sup>Standard uncertainties in temperature (T) =  $\pm 0.01$  K.

**Table S3: Chemical shifts data (in ppm) of various protons in the free state of VC and  $\gamma$ -CD and ICVC.**

| Guest        | Position of Protons           | Chemical shift of pure molecules <sup>a</sup> (ppm) ( $\delta_1$ ) | Chemical shift in inclusion complex <sup>a</sup> (ppm) ( $\delta_2$ ) | Change in chemical shift ( $\delta_2 - \delta_1$ ) |
|--------------|-------------------------------|--------------------------------------------------------------------|-----------------------------------------------------------------------|----------------------------------------------------|
| Valacyclovir | A (C-H)                       | 7.852                                                              | 7.857                                                                 | 0.005                                              |
|              | B (CH <sub>2</sub> )          | 5.391                                                              | 5.414                                                                 | 0.023                                              |
|              | C (CH <sub>2</sub> )          | 4.289                                                              | 4.279                                                                 | -0.010                                             |
|              | D (CH <sub>2</sub> ), E (C-H) | 3.793                                                              | 3.791                                                                 | -0.002                                             |
|              | F (C-H)                       | 1.988                                                              | 1.968                                                                 | -0.020                                             |
|              | G, G'(CH <sub>3</sub> )       | 0.764                                                              | 0.744                                                                 | -0.020                                             |
| $\gamma$ -CD | H-1'                          | 5.016                                                              | 5.006                                                                 | 0.01                                               |
|              | H-3'                          | 3.842                                                              | 3.763                                                                 | -0.079                                             |
|              | H-5'                          | 3.777                                                              | 3.740                                                                 | -0.037                                             |
|              | H-2'                          | 3.571                                                              | 3.639                                                                 | 0.068                                              |
|              | H-4'                          | 3.497                                                              | 3.538                                                                 | 0.041                                              |

<sup>a</sup> Mean error in  $\delta = \pm 0.001$

**Table S4. Data for the conductivity study of VC+ $\gamma$ -CD system (concentration of stock solution of VC = 10 mM, concentration of stock solution of  $\gamma$ -CD = 10 mM) at 298.15 K<sup>a</sup>.**

| Volume of $\gamma$ -CD (mL) | Total volume (mL) | Conc of VC (mM) | Conc of $\gamma$ -CD (mM) | Conductivity (mS.cm <sup>-1</sup> ) |
|-----------------------------|-------------------|-----------------|---------------------------|-------------------------------------|
| 0                           | 10                | 10.000          | 0.000                     | 0.452                               |
| 1                           | 11                | 9.091           | 0.909                     | 0.424                               |
| 2                           | 12                | 8.333           | 1.667                     | 0.396                               |

|    |    |       |       |       |
|----|----|-------|-------|-------|
| 3  | 13 | 7.692 | 2.308 | 0.368 |
| 4  | 14 | 7.143 | 2.857 | 0.344 |
| 5  | 15 | 6.667 | 3.333 | 0.323 |
| 6  | 16 | 6.250 | 3.750 | 0.304 |
| 7  | 17 | 5.882 | 4.118 | 0.287 |
| 8  | 18 | 5.556 | 4.444 | 0.272 |
| 9  | 19 | 5.263 | 4.737 | 0.255 |
| 10 | 20 | 5.000 | 5.000 | 0.247 |
| 11 | 21 | 4.762 | 5.238 | 0.24  |
| 12 | 22 | 4.545 | 5.455 | 0.23  |
| 13 | 23 | 4.348 | 5.652 | 0.23  |
| 14 | 24 | 4.167 | 5.833 | 0.23  |
| 15 | 25 | 4.000 | 6.000 | 0.227 |
| 16 | 26 | 3.846 | 6.154 | 0.227 |
| 17 | 27 | 3.704 | 6.296 | 0.227 |
| 18 | 28 | 3.571 | 6.429 | 0.224 |
| 19 | 29 | 3.448 | 6.552 | 0.224 |
| 20 | 30 | 3.333 | 6.667 | 0.224 |

<sup>a</sup>Standard uncertainty in temperature (T) =  $\pm 0.01$  K.

**Table S5. Data for the surface tension study of VC+ $\gamma$ -CD system (concentration of stock solution of VC = 10 mM, concentration of stock solution of  $\gamma$ -CD = 10 mM) at 298.15 K<sup>a</sup>.**

| Volume of $\gamma$ -CD (mL) | Total volume (mL) | Conc of VC (mM) | Conc of $\gamma$ -CD (mM) | Surface tension (mN.m <sup>-1</sup> ) |
|-----------------------------|-------------------|-----------------|---------------------------|---------------------------------------|
| 0                           | 10                | 10.000          | 0.000                     | 65.9                                  |
| 1                           | 11                | 9.091           | 0.909                     | 67.2                                  |

|    |    |       |       |      |
|----|----|-------|-------|------|
| 2  | 12 | 8.333 | 1.667 | 68.6 |
| 3  | 13 | 7.692 | 2.308 | 69.6 |
| 4  | 14 | 7.143 | 2.857 | 70.4 |
| 5  | 15 | 6.667 | 3.333 | 71.2 |
| 6  | 16 | 6.250 | 3.750 | 71.9 |
| 7  | 17 | 5.882 | 4.118 | 72.4 |
| 8  | 18 | 5.556 | 4.444 | 72.9 |
| 9  | 19 | 5.263 | 4.737 | 73.3 |
| 10 | 20 | 5.000 | 5.000 | 73.6 |
| 11 | 21 | 4.762 | 5.238 | 73.8 |
| 12 | 22 | 4.545 | 5.455 | 74   |
| 13 | 23 | 4.348 | 5.652 | 74   |
| 14 | 24 | 4.167 | 5.833 | 74   |
| 15 | 25 | 4.000 | 6.000 | 74.1 |
| 16 | 26 | 3.846 | 6.154 | 74.1 |
| 17 | 27 | 3.704 | 6.296 | 74.2 |
| 18 | 28 | 3.571 | 6.429 | 74.2 |
| 19 | 29 | 3.448 | 6.552 | 74.2 |
| 20 | 30 | 3.333 | 6.667 | 74.3 |

<sup>a</sup>Standard uncertainties in temperature (T) =  $\pm 0.01$  K.

**Table S6. Data for the Benesi-Hildebrand double reciprocal plot performed by UV-Vis spectroscopy for VC+ $\gamma$ -CD system.**

| Temp /K <sup>a</sup> | [VC] / $\mu$ M | [ $\gamma$ -CD] / $\mu$ M | A <sub>0</sub> | A        | $\Delta A$ | 1/[ $\gamma$ -CD] /M <sup>-1</sup> | 1/ $\Delta A$ | Intercept | Slope      | K <sub>a</sub> /M <sup>-1</sup> |
|----------------------|----------------|---------------------------|----------------|----------|------------|------------------------------------|---------------|-----------|------------|---------------------------------|
| 298.15               | 10             | 10                        | 1.351573       | 1.313484 | 0.038088   | 100000                             | 26.25482      | 0.79308   | 0.00025178 | 3149.8928                       |
|                      | 10             | 20                        |                | 1.275345 | 0.076228   | 50000                              | 13.11854      |           |            |                                 |

|    |     |  |          |          |             |          |  |  |
|----|-----|--|----------|----------|-------------|----------|--|--|
| 10 | 30  |  | 1.240223 | 0.111349 | 33333.33333 | 8.980764 |  |  |
| 10 | 40  |  | 1.180912 | 0.170661 | 25000       | 5.85957  |  |  |
| 10 | 50  |  | 1.175395 | 0.176178 | 20000       | 5.676094 |  |  |
| 10 | 60  |  | 1.167161 | 0.184412 | 16666.66667 | 5.422655 |  |  |
| 10 | 70  |  | 1.164854 | 0.186719 | 14285.71429 | 5.355643 |  |  |
| 10 | 80  |  | 1.130465 | 0.221108 | 12500       | 4.522678 |  |  |
| 10 | 90  |  | 1.119823 | 0.231749 | 11111.11111 | 4.315012 |  |  |
| 10 | 100 |  | 0.975751 | 0.375821 | 10000       | 2.66084  |  |  |
| 10 | 110 |  | 0.965727 | 0.385846 | 9090.909091 | 2.59171  |  |  |

<sup>a</sup>Standard uncertainties in temperature (T) =  $\pm 0.01$  K.

**Table S7: Physicochemical characterization parameters of experimental VC and ICVC containing gel (n=3).**

| Parameter              | VC-loaded gel   | ICVC-loaded gel |
|------------------------|-----------------|-----------------|
| Color                  | Translucent     | Translucent     |
| Odour                  | No bad odour    | No bad odour    |
| pH                     | 5.8 $\pm$ 0.3   | 9.1 $\pm$ 0.7   |
| Viscosity (cP)         | 3548 $\pm$ 232  | 3080 $\pm$ 354  |
| Zeta potential (mV)    | -3.8 $\pm$ 1.0  | -5.7 $\pm$ 0.9  |
| Drug content assay (%) | 99.02 $\pm$ 0.6 | 96.37 $\pm$ 0.8 |

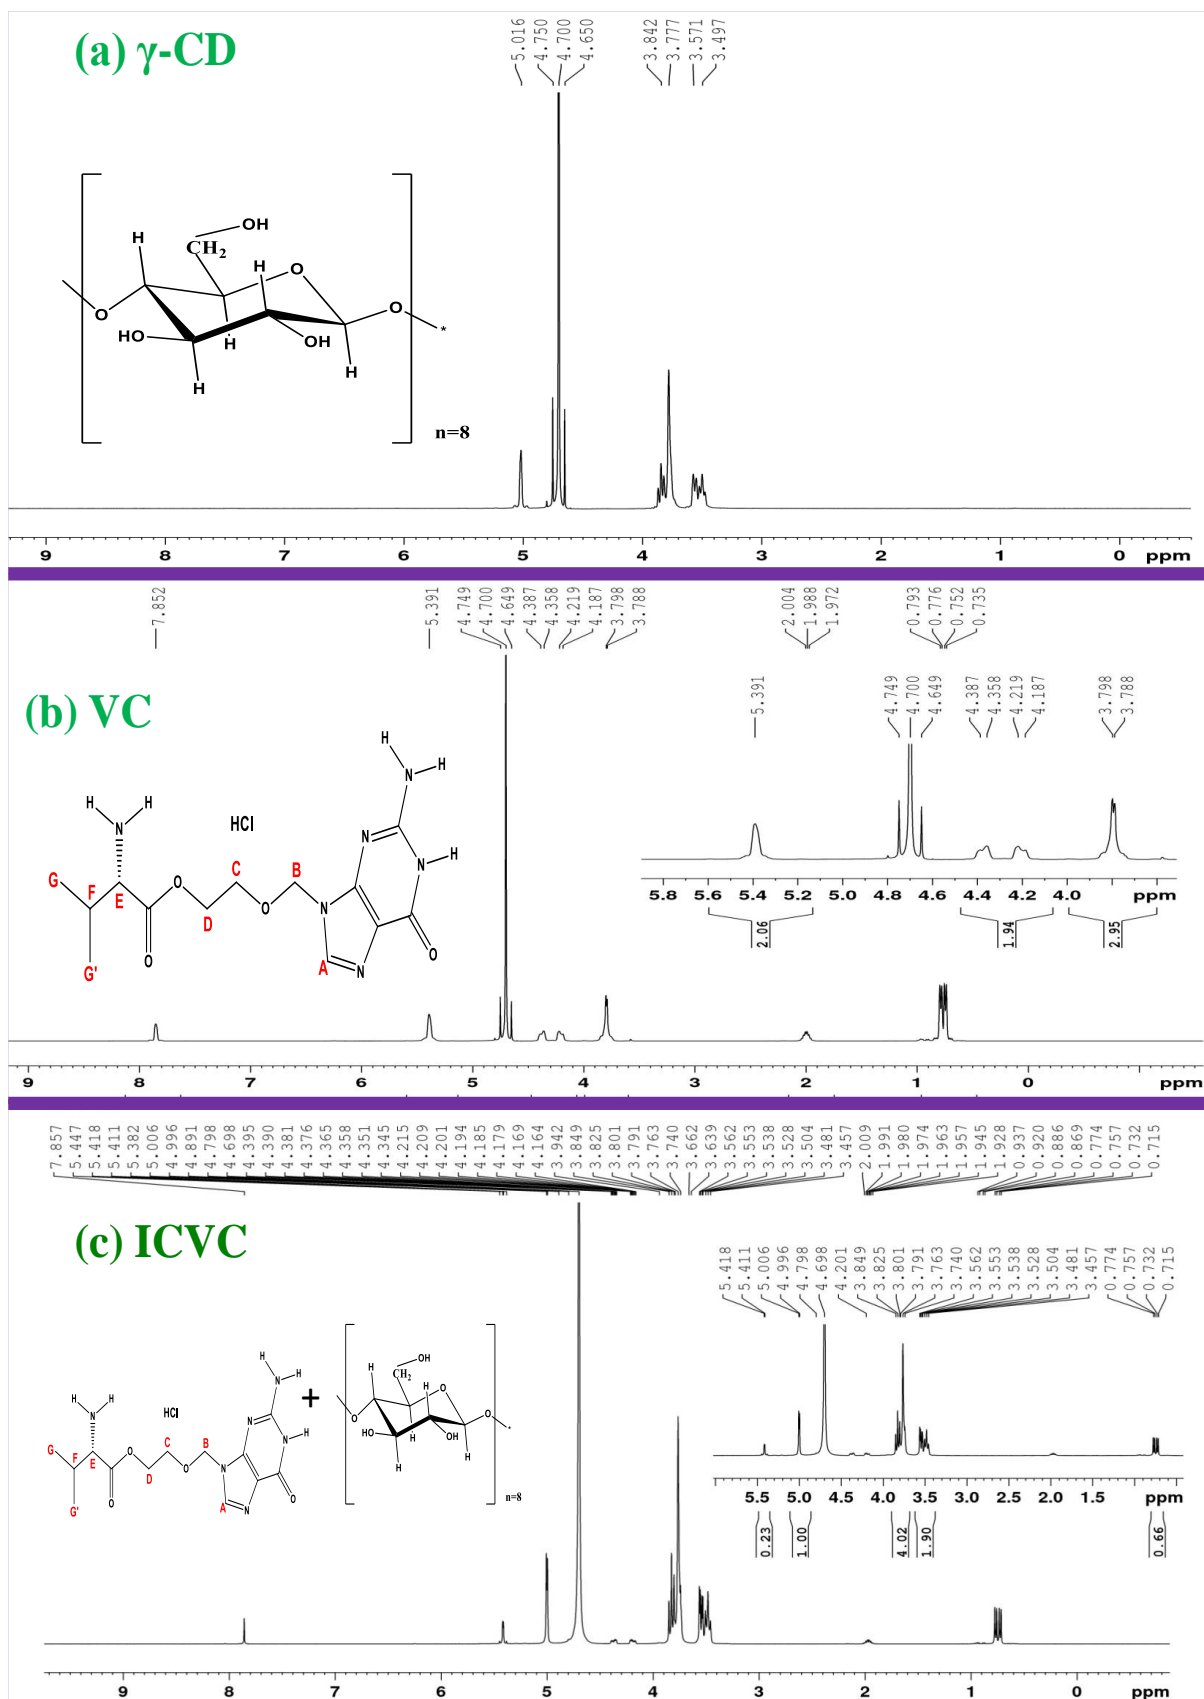

**Figure S1:  $^1\text{H}$ -NMR spectra of (a)  $\gamma$ -CD (b) VC and (c) ICVC in  $\text{D}_2\text{O}$  solvent.**

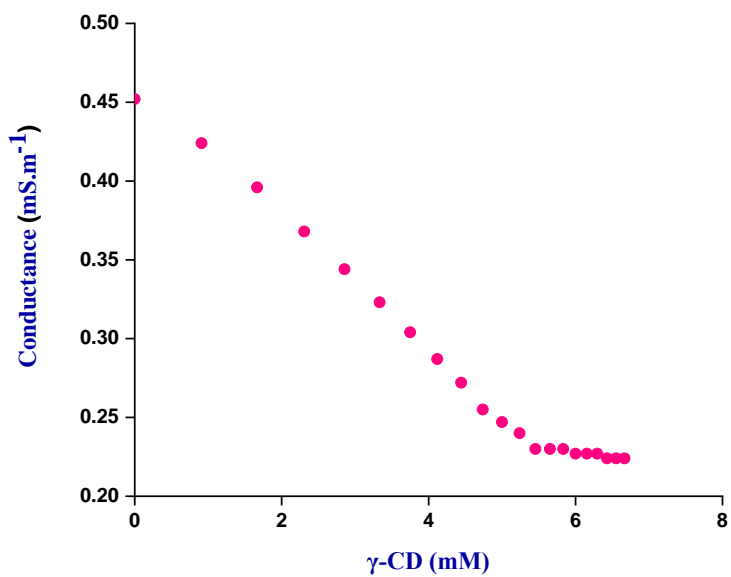

**Figure: S2.** Variation in the aqueous VC conductance with increasing concentration of  $\gamma$ -CD.

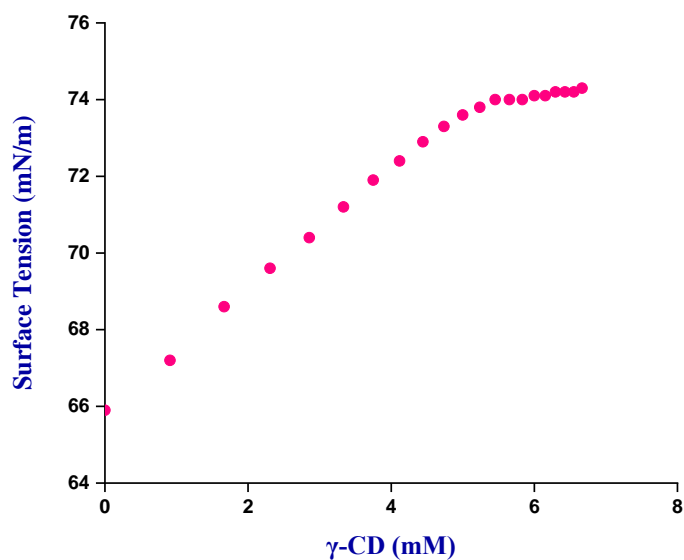

**Figure: S3.** Variation in the surface tension of aqueous VC with increasing concentration of  $\gamma$ -CD at 298.15 K.



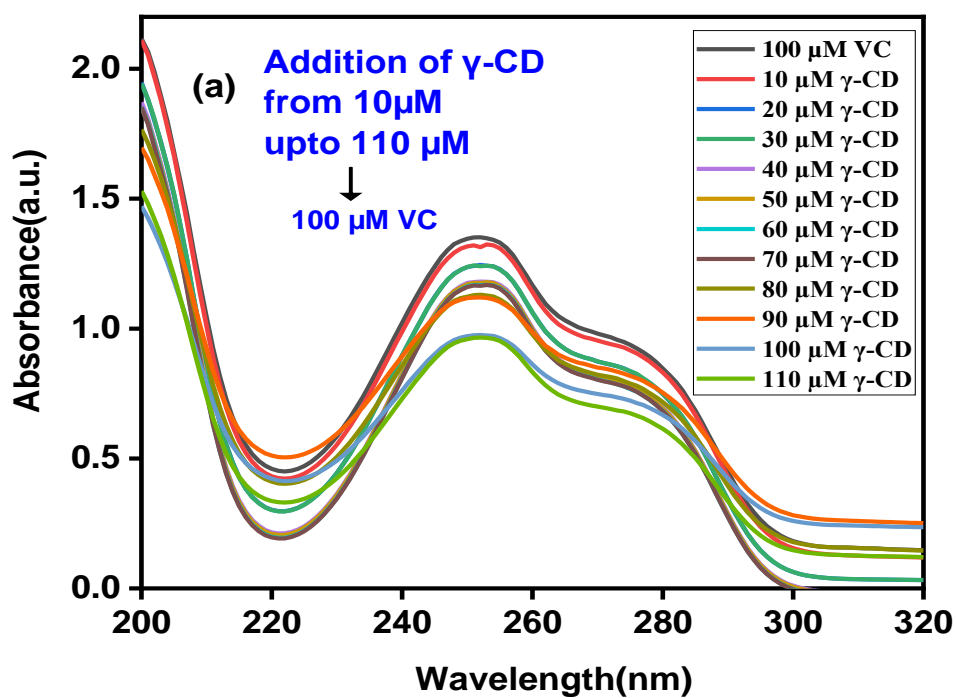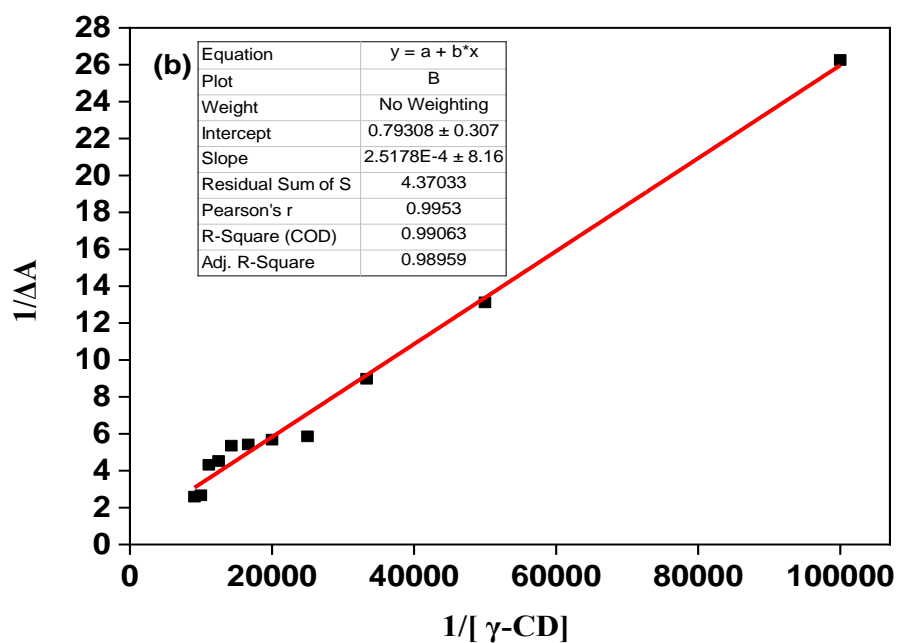

**Figure: S4.** (a) Absorption spectra of 100  $\mu\text{M}$  VC in different concentrations (10  $\mu\text{M}$  to 110  $\mu\text{M}$ ) of aqueous  $\gamma\text{-CD}$  (b) Benesi-Hildebrand double reciprocal plot for the effect of  $\gamma\text{-CD}$  on the absorbance of VC ( $\lambda_{\text{max}} = 252 \text{ nm}$ ) at 298.15 K (X-axis =  $1/[\gamma\text{-CD}]$  and Y-axis =  $1/\Delta A$ ).
